1 ***Cost-effectiveness analysis of social distancing strategies to prevent SARS-CoV2 spread***

2

3 *Amir Shlomai MD, PhD<sub>1</sub>, Ari Leshno MD<sub>2</sub>, Ella H. Sklan PhD<sub>3</sub>\*+, Moshe Leshno MD, PhD<sub>4</sub>\**

4

5 *<sub>1</sub> Department of Medicine D and The Liver Institute, Rabin Medical Center,*

6 *Beilinson Hospital, Petah-Tikva, Israel and The Sackler Faculty of Medicine, Tel Aviv*

7 *University, Tel Aviv, Israel.*

8 *<sub>2</sub> Goldschleger Eye Institute, Sheba Medical Center, Ramat Gan, Israel and The Sackler Faculty*

9 *of Medicine, Tel Aviv University, Tel Aviv, Israel.*

10 *<sub>3</sub> Department of Clinical Microbiology and Immunology, The Sackler Faculty of Medicine, Tel*

11 *Aviv University, Tel Aviv, Israel.*

12 *<sub>4</sub> The Coller School of Management, Tel Aviv University, Tel Aviv, Israel.*

13

14 *\* These senior authors contributed equally to this article;*

15 *+Corresponding author:*

16 Ella H. Sklan [sklan@tauex.tau.ac.il](mailto:sklan@tauex.tau.ac.il)

17 *Mailing Address: Department of Clinical Microbiology and Immunology, Sackler School of*

18 *Medicine, Tel-Aviv University, Ramat Aviv, Tel Aviv, ISRAEL, 69978.*

19 *Phone: +972-3-6408197*

20

21 *Running title: cost-effectiveness of social distancing measures*

22 *Keywords: SARS-CoV-2; Cost-effectiveness; SEIR model.*

23

24 *Article Summary Line: The Cost-effectiveness of two major strategies to control the spread of*

25 *SARS-CoV-2 were compared.*

26 *Conflict of interests:* The authors declare no conflict of interests regarding this work

27 *Funding:* There is no funding to declare regarding this work

28 *IRB:* This work has an IRB exempt (approval attached)

29

30

31

32 ***Abstract—word count (148)***

33 While highly effective in preventing SARS-CoV-2 spread, global quarantine comes with an  
34 enormous economic price. Few countries have adopted an alternative “testing, tracing, and  
35 isolation” approach to selectively isolate people at high exposure risk, thereby minimizing the  
36 economic impact. However, the cost-effectiveness of these approaches was never tested. A  
37 modified Susceptible, Exposed, Infectious, Recovered (SEIR) model was used to test these  
38 strategies and the incremental cost-effectiveness ratio (ICER) was calculated. The expected  
39 number of deaths under global quarantine is 322 vs. 464 under focused isolation. However, the  
40 ICER in the case of global quarantine will be \$75,110,000 to prevent one case of death. Thus,  
41 global quarantine has a moderate advantage in saving lives with tremendous costs that might  
42 result in overwhelming economic effects. These findings should be considered by decision-  
43 makers, while preparing for a possible “second wave” of the pandemic or as a lesson for future  
44 pandemics.

45

46 ***Text—word count (3403)***

47

48 ***Introduction:***

49 Since its identification at the very end of 2019, the novel coronavirus (SARS-CoV-2) has been  
50 spreading around the world at an extraordinary rate and has now been officially declared a  
51 pandemic (1). Observing the dreadful situation in countries such as Italy and Spain (2) and  
52 following social distancing measures, travel bans and isolation of infected patients and their  
53 close contacts (3), many countries are now undertaking extreme measures such as global  
54 quarantine, in the effort not to overwhelm their health systems. However, only a few countries,  
55 such as South Korea, have succeeded in slowing the infection rates without employing  
56 economically damaging lockdowns. Instead, South Korea applied early interventions that  
57 included identification and isolation of outbreak sources by massive screening of infected  
58 patients and aggressive tracing and isolation of their contacts (4).

59 It is not yet clear whether the apparent success of South Korea could be applied to other  
60 countries in North America and Europe. It is, however, obvious that extreme non-selective  
61 measures are associated with tremendous economic costs and will result in a global financial  
62 crisis that will most likely affect public health and other essential aspects of our lives in the  
63 coming years. Therefore, as we might face “second waves” of this epidemic and as a lesson for  
64 future epidemics, the cost-effectiveness of these two approaches should be compared.

65 In this study, we applied a modified Susceptible, Exposed, Infectious, Recovered (SEIR) model  
66 (5), comparing two major strategies: 1. Complete global (non-selective) quarantine of the whole  
67 population; 2. Focused isolation and massive screening of individuals at high exposure risk,  
68 who, after testing negative, will return to the workforce under social distancing measures  
69 together with the rest of the susceptible population. The study aimed to analyze the cost-  
70 effectiveness of these strategies in reducing the spread of SARS-CoV-2 and preventing death.

71 The model’s variables are compatible with currently established parameters in the literature and

72 rely on the actual number of infected patients and deaths in Israel, a country with a population of  
73 approximately 9 million, at the beginning of May 2020.

74 **Methods:**

75 **Model construction:**

76 A simulation model of SARS-CoV-2 transmission was constructed (Fig S4). The model includes  
77 six compartments (modified SEIR model(5)):

- 78 1. Susceptible (S): Individuals susceptible to SARS-CoV-2 infection.
- 79 2. Exposed (E): Individuals infected with SARS-CoV-2, who can transmit the virus to  
80 susceptible individuals. These exposed individuals may be tested for SARS-CoV-2 and  
81 isolated accordingly. We further divided the exposed state into two compartments: exposed  
82 people who do not develop clinical symptoms (EA) and exposed people who will develop  
83 clinical symptoms (I).
- 84 3. Exposed asymptomatic (EA): Patients infected with SARS-CoV-2 who do not develop  
85 clinical symptoms and can transmit the virus to susceptible patients. These patients may be  
86 tested for SARS-CoV-2 and isolated accordingly.
- 87 4. Infected (I): Patients with symptoms of the disease will be tested for SARS-CoV-2, using a  
88 PCR test with close to 100% sensitivity. Patients with confirmed infection will be placed in  
89 complete isolation to prevent further transmission.
- 90 5. Recovered (R): Patients who were infected with SARS-CoV-2 and recovered (recovery does  
91 not confer lifelong immunity).
- 92 6. Death (D): Patients who died because of coronavirus disease 2019 (COVID-19)  
93 complications.

94 The mathematical ordinary differential equations (ODE) that illustrate our model are displayed  
95 in Figure S4.

96  $\beta$  – transmission rate from carriers (E) to the susceptible population (S). We assume that the  
97 transmission rates from the infectious population (I) and from the carrier population (EA) are  
98 identical. However, if infectious subjects are isolated, the rate of transmission from the “I” to the  
99 “S” population will decrease. If the size of the “I” population decreases by 50% due to isolation,  
100 the rate of transmission from “I” to “S” will decrease by 50% ( $\beta_1 = \beta \times 50\%$ ). Similarly, if we  
101 isolate the “E” population, the transmission rate from “E” to “S” will decrease accordingly ( $\beta_2$ ).

102  $\theta$  – the proportion of exposed individuals that will develop symptoms.

103  $\sigma$  – transition rate from carrier state (E) to infected state (the time from exposure to symptom  
104 onset), assuming that the incubation period has an exponential distribution.

105  $\delta$  – mortality rate of the infected population.

106  $\gamma$  – recovery rate of the infected population.

107  $\alpha$  – transmission rate from the recovered population to the susceptible population.

108  $R_0$  (Reproductive Number) – the expected number of secondary infections from an infected  
109 individual. If  $R_0 < 1$ , then the pathogen will be cleared from the population. Otherwise, the  
110 pathogen will be able to infect the whole susceptible population. Note that  $R_0 = \frac{\beta}{\gamma}$ .

111 We estimated the number of deaths and the total cost of each strategy (described below) and  
112 calculated the cost per avoided death (denoted by incremental cost-effectiveness ratio (ICER).

113 The costs were based on the gross domestic product (GDP) per capita in Israel (\$40,270) or GDP  
114 per capita per day, namely \$130. In the model, we estimated that the cost of isolating one person  
115 per day is \$70. The time horizon in the model was 200 days.

#### 116 **Strategies:**

117 We define three levels of actions:

118 **Social distancing** – maintaining a 2-meter distance between people outside a household at all  
119 times, wearing face masks in all public places, avoiding large group gatherings.

120 **Quarantine** – separating people and limiting movement of people by confining them to their  
121 homes to prevent exposure and infection. There is no limit on interactions between people living  
122 in the same house hold.

123 **Isolation** – complete isolation of infected people or individuals at high exposure risk. This is  
124 typically done in a dedicated facility. Home isolation can be achieved by preventing interaction  
125 with family members and avoiding sharing of household items.

126 In this study we compare the cost-effectiveness of two strategies (Table S2):

127 Strategy 1: A global quarantine of the susceptible population. Individuals in exceptional  
128 circumstances who are not quarantined will be required to maintain social distancing. All known  
129 exposed individuals will be under complete isolation.

130 Strategy 2: The susceptible population will be required to maintain social distancing. All known  
131 exposed individuals will be under isolation. Individuals who are at high exposure risk due to  
132 possible contacts with infected or carrier subjects will be located using detailed epidemiological  
133 tracing and/or using mobile phone and satellite technology. These people will be subjected to a  
134 14-day isolation period during which they will be repeatedly tested every three days for the  
135 presence of SARS-CoV-2 using PCR. Under this strategy, only the high exposure risk group will  
136 be quarantined, while most of the susceptible population will go back to the workforce. In  
137 addition, extensive PCR testing will identify carriers and infected individuals within the  
138 population and will prevent unnecessary isolation of non-infected individuals. Subjects with two  
139 sequential negative PCR results will be removed back into the workforce. We estimated that the  
140 length of isolation in the high-risk population will decrease from two weeks to an average of  
141 seven days, which is within the range of the average incubation period (6-8).

142 In addition to the two main strategies mentioned above, we estimated the number of deaths and  
143 the size of the infectious population, in another hypothetical strategy of no intervention at all.

144 The list of parameters in the model as well as the low and high values that were used for  
145 sensitivity analysis are presented in Table 1.

146 ***Parameter estimation and calibration:***

147 The following parameter estimates were used to construct the model (Table 1):

148 Exposed (Carriers E0) were defined as the number of infected individuals who are currently  
149 undocumented. For our basic model we estimated 10,000 undocumented carriers. In a screening  
150 conducted in Iceland (9), 0.6-0.8% were carriers and 46-59% had symptoms, which yields about  
151 20,000 undocumented carriers. However, after calibration of the parameters, the estimate of  
152 10,000 undocumented carriers had a better fit to the number of deaths in Israel during March 27,  
153 2020 until May 3, 2020 (Fig S5).

154 The initial number of infected individuals (I0) was determined according to the Israeli Ministry  
155 of Health publications on March 27, 2020. The number of susceptible individuals was defined as  
156 a rounded approximation of the population in Israel (9 million) after subtracting the infected and  
157 undocumented carriers. Complete isolation refers to infected individuals who are hospitalized  
158 (including individuals in intensive care units) or isolated in a dedicated facility. The isolation  
159 costs are calculated using an estimation of the price of lost workdays and hospitalization.

160 Quarantine refers to home confinement and thus the estimated costs include only the price of lost  
161 workdays.

162 To calculate the recovery rate ( $\gamma$ ), an estimation of 26 days with a range of 21 to 32 days for the  
163 time from symptom onset to recovery was taken, compatible with several recent studies (8, 10-  
164 12). The average incubation period ( $\sigma$ ) was estimated to be approximately 5.1 (6-8).

165 We used  $R_0=2.6$  (range 2.0-7.2) (13), assuming that the recovery time is 26 days. Thus the  
166 transmission rate from infected (carrier) patients to the susceptible population ( $\beta$ ) was 0.1 (range  
167 0.07 to 0.3) (13). As all subjects coming to Israel from abroad are isolated, in the model we did  
168 not include imported cases. Case fatality rates vary between different countries, ranging from



169 7.2% in Italy to 0.2% in Germany (14). Thus, for the rate of death ( $\delta$ ) in our basic model we  
170 considered a moderate estimate of 2.6% or 0.001 per day over 26 days of infection.  
171 RR1-3 represents the probability of the reduction in contacts due to the actions taken. The  
172 estimation of these parameters was based on the calibration analysis (Fig. S5).  
173 The assumptions used for the two strategies are described in Table S3. In strategy 1,  $r1\_HR\_c$   
174 represents the proportion of the population under isolation due to a high risk of contact with  
175 SARS-CoV-2 patients (0.7%). Under strategy 1, we estimated the proportion of the susceptible  
176 population under quarantine ( $r\_S$ ) to be 80%, while the proportion of the carrier ( $r1\_E$ )  
177 population that is under isolation was estimated at 30%. By contrast, under strategy 2  
178 ( $r2\_HR\_c$ ), the proportion of the population under isolation will be lower (0.3%) due to repeated  
179 testing. Under strategy 2, the number of susceptible individuals under quarantine ( $r2\_S$ ) will be  
180 0, while the proportion of carriers ( $r1\_E$ ) that are under isolation will remain 30%.  
181 The time horizon was 200 days and therefore the discount rate was 0. In addition, favoring  
182 strategy 1, we assumed that the cost of isolation is only for 14 days. The analysis was performed  
183 using MATLAB.

#### 184 ***Sensitivity analysis:***

185 We used one-way sensitivity analysis of all the parameters in the model (see Tables 1+S3 for the  
186 range used for the sensitivity analysis). We constructed the Tornado diagram for the ICER and  
187 the number of deaths in each strategy.

#### 188 ***Monte Carlo simulation:***

189 We performed a Monte Carlo simulation to assess the effects of ranging base case variables on  
190 model outcomes with 1000 draws from probability distributions of model parameters.

191

192

193

194 **Results:**

195 We first tested our model with strategy 1: Global quarantine of the susceptible population,  
196 complete isolation of all infected individuals and two weeks of isolation for the high exposure  
197 risk group. Applying this strategy will yield a peak of 7,256 infected individuals followed by a  
198 rapid decline (Fig. 1, right upper panel) with a total of 15,964 infected individuals over the 200-  
199 day period. Under this strategy, the number of expected deaths is 322 (Fig. 1, right lower panel).  
200 This number will be reached after ~100 days. In the second strategy, infected individuals will  
201 remain under complete isolation. However, instead of global quarantine, only high exposure risk  
202 individuals will be isolated. These individuals will be tested every four days for SARS-CoV-2  
203 by PCR. Individuals testing negative and the rest of the susceptible population will return to the  
204 workforce under social distancing rules. Under these conditions, the maximum number of  
205 infected individuals will slightly increase to 8,110, with a total of 23,774 infected individuals  
206 over the 200 days period (Fig. 2, right upper panel). The total number of deaths will increase to  
207 464 (Fig. 2, right lower panel).

208 Table S1 summarizes the costs and number of deaths under each strategy. Factoring the cost of  
209 workday loss, complete isolation (in a dedicated facility or under hospitalization) and the PCR  
210 tests enabled us to calculate the following ICER value:

$$211 \text{ ICER} = \frac{1.0694e+10 - 8.8015e+07}{464 - 322} = \frac{1.0606e+10}{142} = 75,110,000$$

212

213 Thus, under these conditions, the cost of preventing one death is \$ 75,110,000.

214 The results of a one-way sensitivity analysis for both strategies are displayed in Fig 3. The two  
215 variables with the strongest influence on ICER were the virus transmission rate ( $\beta$ ) and the daily  
216 mortality rate ( $\delta$ ) (Fig 3). A one-way sensitivity analysis showing the effect of these parameters  
217 on ICER is displayed in Figure S1.

218 An additional sensitivity analysis was performed for the number of expected deaths under both  
219 strategies. As shown in Figure S2, the initial carrier population figure, the daily mortality rate ( $\delta$ )  
220 and the virus transmission rate ( $\beta$ ) were the parameters with the greatest effect on the death rate.  
221 A probabilistic simulation analysis (Monte Carlo simulation) of the expected death rate for each  
222 strategy and of the expected ICER are displayed in Fig 4 and Fig 5, respectively. The median  
223 difference between strategy 1 and 2 in the number of deaths is 93 (95% CI 16-357) and the  
224 median ICER is \$ 70.7 million (95% CI 4.4-408.1) per one avoided death.  
225 Finally, we tested our model under a situation of no intervention. Starting from a baseline of  
226 10,000 carriers and 3,000 infected individuals, the maximal number of infected individuals is  
227 1.37 million, (Fig. S3, right upper panel). This number will be reached after 200 days. Under  
228 these conditions, the expected number of deaths is 123,420 (Fig. S3, right lower panel).

#### 229 ***Discussion:***

230 The SARS-CoV-2 pandemic has serious global consequences and a substantial death rate,  
231 affecting 187 countries around the world. So far, this epidemic has affected over 3.2 million  
232 people and claimed the lives of more than 233,000 individuals (15, 16). The first priority in most  
233 countries is to enable the local health systems to handle the growing number of patients needing  
234 hospitalization and intensive care by “flattening the infection curve”. In countries that were late  
235 in taking drastic steps, the rapid spread of the disease has been accompanied by a high death toll,  
236 and an extraordinary sustained burden on the public health system that necessitated controlled  
237 distribution and use of scarce medical resources (17). In China, where the pandemic first  
238 emerged, drastic measures of global quarantine have successfully controlled virus spread and are  
239 now enabling a gradual release of the quarantined population (18). However, adopting these  
240 extreme measures carries unprecedented social and economic costs that might, both directly and  
241 indirectly, affect the health system and many other aspects of our life in the years to come.  
242 While “first wave” of this pandemic is slowly waning in most countries, there is an urgent need

243 to examine the strategies undertaken in terms of cost-effectiveness as a preparation for possible  
244 future “waves” of the SARS-CoV-2 pandemic, or as a lesson towards future pandemics.  
245 In this study, we applied cost-effectiveness analysis tools to distinguish between two different  
246 strategies aimed to slow down the spread of the virus. We show that a global quarantine of the  
247 whole population (strategy 1) will result in a total of ~15,964 infected people and around 322  
248 deaths over a period of 200 days. An alternative “testing, tracing, and isolation” approach  
249 (strategy 2) in which only high exposure risk individuals are isolated and repeatedly tested will  
250 result in a total of 23,774 infected individuals and 464 deaths. Overall, strategy 1 is expected to  
251 save ~142 more lives, but with a cost of \$75,110,000 to prevent one case of death, compared to  
252 the more focused approach. Usually, ICER in cost-effectiveness analyses relates to cost per  
253 quality-adjusted life year (QALY). In our study, ICER was calculated as the cost per one  
254 avoided death. We suggest an easy transformation of the ICER in this study to conventional  
255 ICER in cost-effectiveness analyses. Assuming that one case of death is equivalent to a loss of  
256 10 QALYs, the ICER would be \$75,110,000 divided by 10, resulting in \$7.5 million per QALY.  
257 This number is still very much higher than the \$150,000 per QALY, recommended by Neumann  
258 et al. as the threshold of willingness to pay (19). Another parameter, used to assess the cost of  
259 death in other fields, is a statistical measure of the willingness to pay for small reductions in  
260 mortality risks, known as the value of a statistical life (VSL), estimated to be ~\$ 10,000,000  
261 (20). Similarly, this value is much lower than our calculated ICER.  
262 A key component of the “testing, tracing, and isolation” strategy is massive and repeated testing  
263 of the population at high exposure risk. We assumed that this should require four PCR tests for  
264 each high-risk individual during the 14 days of isolation, meaning ~10,000-15,000 tests daily for  
265 a population of 9 million. This number translates to ~1700 tests per million people. For  
266 comparison, South Korea performs four times more tests daily, indicating that this approach is  
267 feasible (14). Of note, serological tests, when available, might also be used as a part of this

268 strategy. These tests would most likely improve its efficiency since they seem to be able to  
269 detect infection from a few days after symptom onset up to several months or more, and thus  
270 fewer tests would be needed per high-risk individual (11).

271 One of the major concerns during a pandemic is that the number of patients needing intensive  
272 care and mechanical ventilation will overwhelm the local health care system. According to our  
273 model, a no-intervention approach will result in an unacceptable number of infected individuals  
274 (1.37 million) and an extremely high death rate (~123,420), and therefore is not realistic. In  
275 contrast, the difference in the peak number of infected patients between the two main strategies  
276 tested is ~854 patients, in favor of strategy 1. Assuming that 10% of patients are at risk of  
277 developing a severe form of the disease, this translates into an additional 85 potential  
278 hospitalizations and mechanical ventilations at the peak, an acceptable extra burden.

279 As with similar models, the validity of this model is based on the correct assumption of the  
280 various parameters. Since SARS-CoV-2 is a new virus and the exact infection rates in the  
281 population are still unknown, these parameters are subject to variations and may change over  
282 time. To validate our model, we calibrated it by comparing the rate of deaths according to our  
283 model assumptions with the real-time published number of this parameter in Israel (Fig. S5).  
284 The graphs obtained were strikingly similar, further confirming our model.

285 One major limitation of compartment models is that they assume a homogeneous population,  
286 which is not the case in many countries. In Israel, for example, the reproductive number ( $R_0$ ) is  
287 most probably higher among some religious groups. This might alter the infection dynamics and  
288 affect the outcome of the model.

289 Our sensitivity analysis indicates that  $\beta$  (the transmission rate) is the parameter with the most  
290 influence on ICER.  $\beta$  relies on  $R_0$ , which might change, and on the recovery time, which will  
291 most likely remain the same. However, since a similar  $R_0$  is used for modeling both strategies,  
292 we believe that the difference in the number of deaths and ICER will remain similar.

293 Obviously, strategy 2 of “trace, isolate, test and treat”, largely representing the steps successfully  
294 undertaken by South Korea to handle the situation, demands two major critical components:  
295 1. Intensive epidemiological investigations of infected patients combined with surveillance to  
296 trace possible interactions. 2. Availability of enough testing kits and facilities to enable a large  
297 number of daily PCR tests to isolate subjects at high exposure risk.

298 Obviously, the intensive epidemiological investigations, necessary to define people at high  
299 exposure risk who must be isolated and repeatedly tested, imply massive use of mobile phone  
300 and satellite technology, thereby violating citizens’ privacy rights. Therefore, decision-makers  
301 must carefully weigh their options in the knowledge that avoiding those extreme steps and  
302 choosing global quarantine strategies comes with a very high economic price.

303 In summary, in this cost-effectiveness analysis, we show that a strategy of global quarantine  
304 over time is moderately superior to a strategy of focused isolation and repeated testing in terms  
305 of reducing death rates, but involves extremely high economic costs to prevent one case of  
306 death. These economic costs might add to the future death toll resulting from a possible  
307 economic crisis, and thus these options should be carefully considered and balanced.

308 Furthermore, our proposed “trace, isolate, test and treat” strategy is highly relevant as an exit  
309 strategy in countries relaxing global isolation or for coping with future “waves”, thereby keeping  
310 infections levels controlled while returning most of the population to the workforce.

311

## 312 **Acknowledgements**

313 EHS is grateful to the Milner foundation for its support.

314 We thank Gerda Kessler for her assistance in editing this manuscript.

315

316

317

318 **References:**

- 319 1. Bedford J, Enria D, Giesecke J, Heymann DL, Ihekweazu C, Kobinger G, et al. COVID-  
320 19: towards controlling of a pandemic. *The Lancet*. 2020 2020/03/17/.
- 321 2. Onder G, Rezza G, Brusaferro S. Case-Fatality Rate and Characteristics of Patients Dying  
322 in Relation to COVID-19 in Italy. *JAMA*. 2020.
- 323 3. Lewnard JA, Lo NC. Scientific and ethical basis for social-distancing interventions against  
324 COVID-19. *The Lancet Infectious Diseases*. 2020 2020/03/23/.
- 325 4. Cohen J, Kupferschmidt K. Countries test tactics in ‘war’ against COVID-19. *Science*.  
326 2020;367(6484):1287.
- 327 5. Li MY, Graef JR, Wang L, Karsai J. Global dynamics of a SEIR model with varying total  
328 population size. *Math Biosci*. 1999 Sep;160(2):191-213.
- 329 6. Guan W-j, Ni Z-y, Hu Y, Liang W-h, Ou C-q, He J-x, et al. Clinical Characteristics of  
330 Coronavirus Disease 2019 in China. *New England Journal of Medicine*. 2020.
- 331 7. Lauer SA, Grantz KH, Bi Q, Jones FK, Zheng Q, Meredith HR, et al. The Incubation  
332 Period of Coronavirus Disease 2019 (COVID-19) From Publicly Reported Confirmed  
333 Cases: Estimation and Application. *Ann Intern Med*. 2020 Mar 10.
- 334 8. Xu Y, Li X, Zhu B, Liang H, Fang C, Gong Y, et al. Characteristics of pediatric SARS-  
335 CoV-2 infection and potential evidence for persistent fecal viral shedding. *Nature*  
336 *Medicine*. 2020 2020/03/13.
- 337 9. Gudbjartsson DF, Helgason A, Jonsson H, Magnusson OT, Melsted P, Norddahl GL, et al.  
338 Spread of SARS-CoV-2 in the Icelandic Population. *New England Journal of Medicine*.  
339 2020.
- 340 10. Bi Q, Wu Y, Mei S, Ye C, Zou X, Zhang Z, et al. Epidemiology and Transmission of  
341 COVID-19 in Shenzhen China: Analysis of 391 cases and 1,286 of their close contacts.  
342 medRxiv. 2020:2020.03.03.20028423.

- 343 11. Amanat F, Nguyen T, Chromikova V, Strohmeier S, Stadlbauer D, Javier A, et al. A  
344 serological assay to detect SARS-CoV-2 seroconversion in humans. medRxiv.  
345 2020:2020.03.17.20037713.
- 346 12. Zou L, Ruan F, Huang M, Liang L, Huang H, Hong Z, et al. SARS-CoV-2 Viral Load in  
347 Upper Respiratory Specimens of Infected Patients. *New England Journal of Medicine*.  
348 2020 2020/03/19;382(12):1177-9.
- 349 13. Lan L, Xu D, Ye G, Xia C, Wang S, Li Y, et al. Positive RT-PCR Test Results in Patients  
350 Recovered From COVID-19. *Jama*. 2020 Feb 27.
- 351 14. Roser M, Ritchie H, Ortiz-Ospina E. Coronavirus Disease (COVID-19) Published online  
352 at [OurWorldInData.org](https://ourworldindata.org/).; 2020.
- 353 15. Worldometers.info. 2020 [cited; Available from: <https://www.worldometers.info/>]
- 354 16. WHO. Coronavirus disease (COVID-19) outbreak. [cited; Available from:  
355 <https://www.who.int/emergencies/diseases/novel-coronavirus-2019>]
- 356 17. Emanuel EJ, Persad G, Upshur R, Thome B, Parker M, Glickman A, et al. Fair Allocation  
357 of Scarce Medical Resources in the Time of Covid-19. *N Engl J Med*. 2020 Mar 23.
- 358 18. Salzberger B, Gluck T, Ehrenstein B. Successful containment of COVID-19: the WHO-  
359 Report on the COVID-19 outbreak in China. *Infection*. 2020 Apr;48(2):151-3.
- 360 19. Neumann PJ, Cohen JT, Weinstein MC. Updating Cost-Effectiveness — The Curious  
361 Resilience of the \$50,000-per-QALY Threshold. *New England Journal of Medicine*. 2014  
362 2014/08/28;371(9):796-7.
- 363 20. Kip VW. THE VALUE OF LIFE. Harvard John M Olin Discussion Paper Series  
364 2005;517.

365

366



367 **Table 1. General assumptions including the range for sensitivity analysis.**

|                                                                  | Base   | Low    | High   | comments                                                      |
|------------------------------------------------------------------|--------|--------|--------|---------------------------------------------------------------|
| E0                                                               | 10,000 | 5000   | 30,000 | initial number of carriers                                    |
| I0                                                               | 3,000  | 2,000  | 4,000  | initial number of infected individuals                        |
| R0                                                               | 80     | 0      | 100    | initial number of recovered individuals                       |
| D0                                                               | 12     | 0      | 10     | initial number of deaths                                      |
| Cost of global isolation (including hospitalization and ICU, \$) | 250    | 150    | 350    |                                                               |
| Cost of relaxed isolation or quarantine (\$)                     | 70     | 50     | 120    |                                                               |
| Cost of PCR test (\$)                                            | 50     | 20     | 75     |                                                               |
| $R_0$                                                            | 2.6    | 2      | 7.8    |                                                               |
| $\gamma$ (gamma)                                                 | 0.038  | 0.031  | 0.048  | 1/time to recovery (21 to 32 days)                            |
| $\beta$ (beta)                                                   | 0.1    | 0.07   | 0.3    | Calculated $R_0 \times \gamma$                                |
| $\sigma$ (sigma)                                                 | 0.2    | 0.08   | 0.2500 | 1/incubation time (4 to 12 days)                              |
| $\delta$ (delta)                                                 | 0.001  | 0.0005 | 0.002  | Rate of deaths per day                                        |
| $\theta$ (Theta)                                                 | 0.7    | 0.5    | 1      | Proportion of exposed individuals that developed symptoms     |
| RR1                                                              | 0.35   | 0.25   | 0.45   | Reduction in probability of contacts due to social distancing |
| RR2                                                              | 0.85   | 0.8    | 0.9    | Reduction in probability of contacts due to quarantine        |
| RR3                                                              | 0.90   | 0.85   | 0.95   | Reduction in probability of contacts due to isolation         |

368

369 **Figure legends:**

370 **Figure 1: Infection dynamics under global quarantine (strategy 1).**

371 The graphs display the dynamics within the six compartments over time. Susceptible (S, blue);  
 372 Infected (I, red); Carrier (Yellow, E); Carrier asymptomatic (Yellow, EA); Recovered (R,  
 373 Green), Dead (D, Black).

374

375 **Figure 2: Infection dynamics during isolation of high-risk individuals and extensive testing**  
 376 **(strategy 2).** Graphs are labeled as described under Fig. 1.

377

378 **Figure 3: Sensitivity analysis (Tornado diagram) of the incremental cost-effectiveness ratio**  
 379 **(ICER) between the two strategies.** Red bars indicate that the value was produced by the

380 Lower Bound (Low), and dark blue bars indicate that the value was produced by the Upper  
381 Bound (High).

382

383 **Figure 4: Probabilistic sensitivity analysis for the number of deaths in each strategy.** A

384 Monte Carlo simulation was used to assess the probability distribution of the expected number  
385 of deaths according to each strategy.

386

387 **Figure 5: Probabilistic sensitivity analysis for the ICER.** A Monte Carlo simulation was used

388 to assess the probability distribution of the ICER (expressed in millions of \$US). The graph was

389 truncated at \$500 million.

390

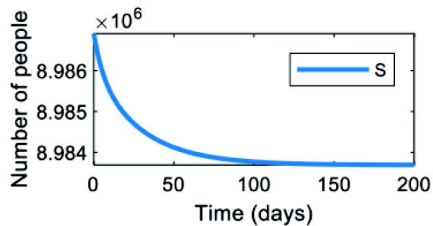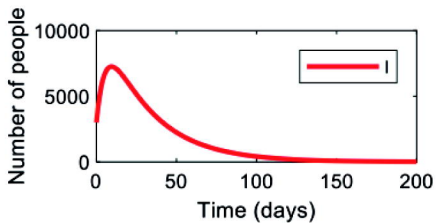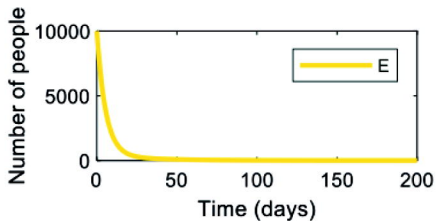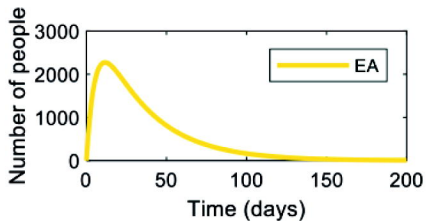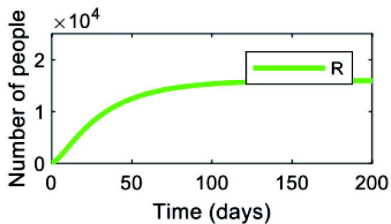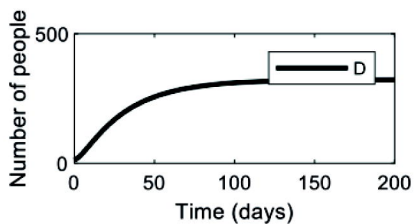

Fig 1

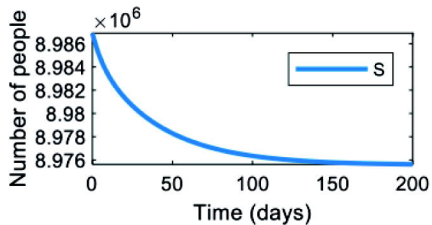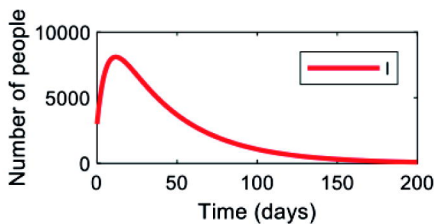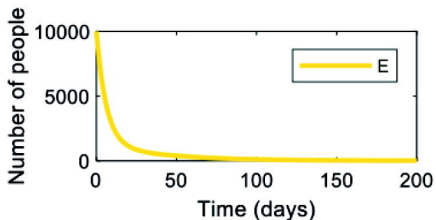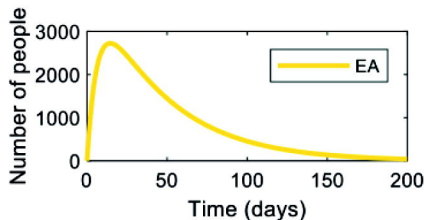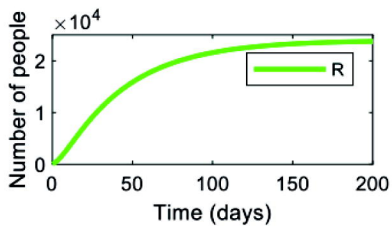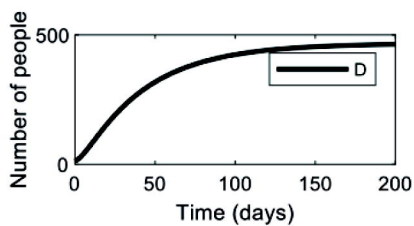

Fig 2

## Tornado Analysis (ICER)

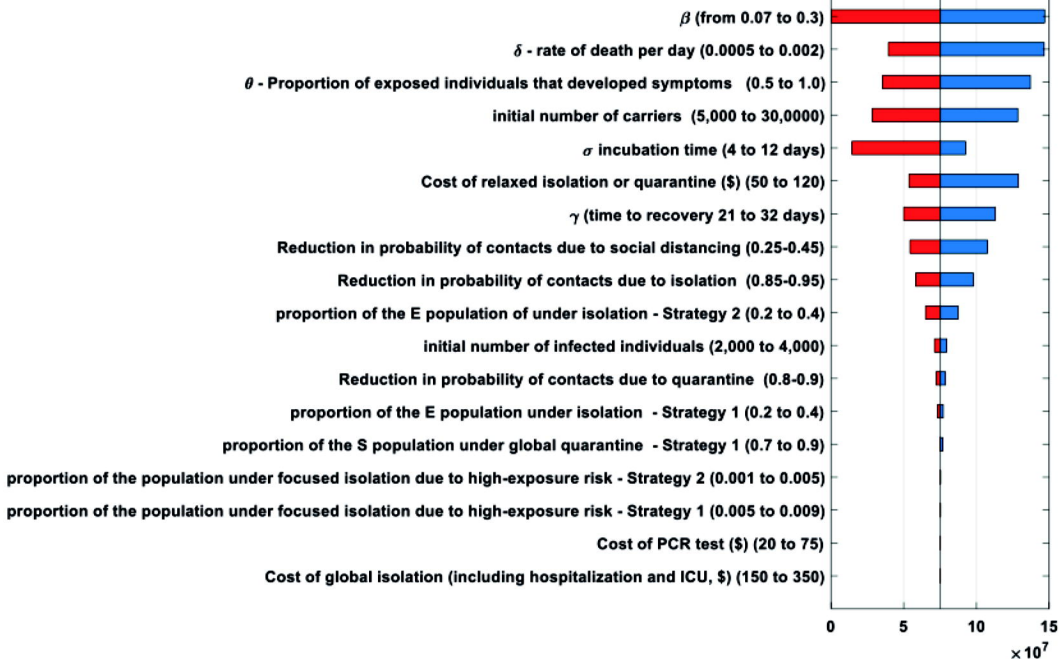

Fig 3

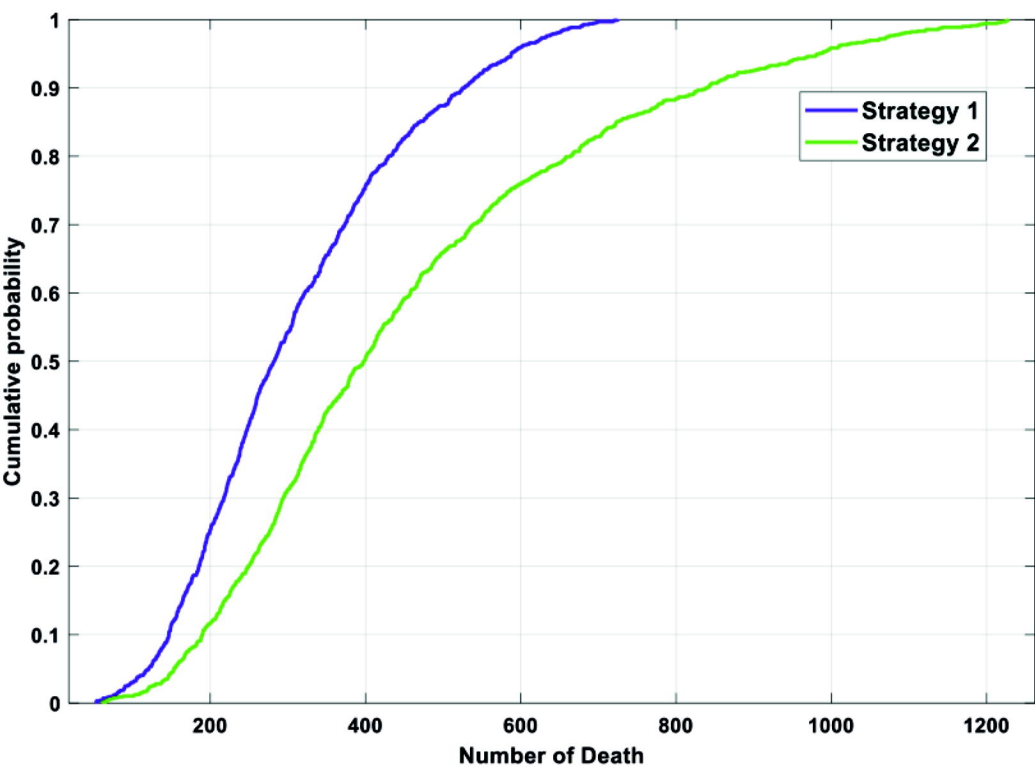

Fig 4

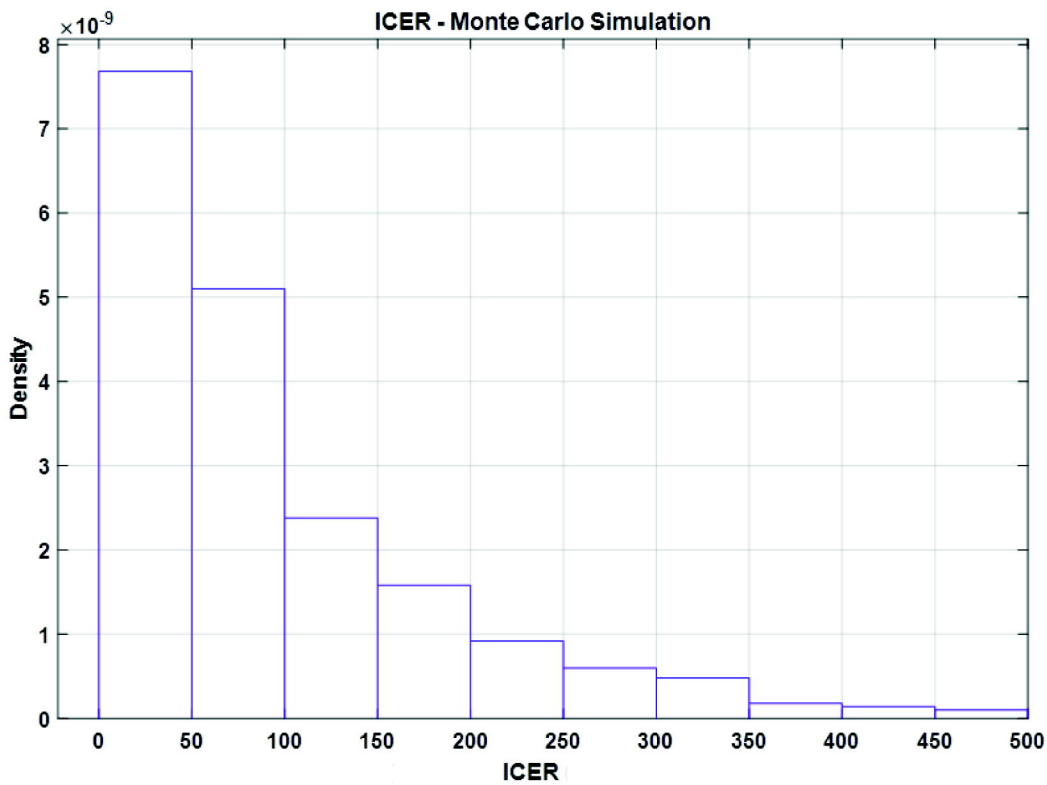

Fig 5
